# THE AMERICAN PSYCHIATRIC ASSOCIATION

1000 Wilson Blvd., Suite 1825, Arlington, VA 22209-3901  
(888) 357-7924 (toll-free inside the U.S. and Canada) / (703) 907-7300  
web site: [www.psychiatry.org](http://www.psychiatry.org) • e-mail: [apa@psych.org](mailto:apa@psych.org)

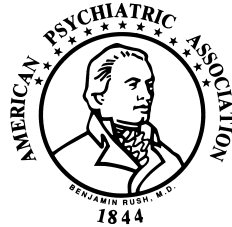

## OFFICERS 2013–2014

|                 |                            |
|-----------------|----------------------------|
| President       | Jeffrey A. Lieberman, M.D. |
| President-Elect | Paul Summergrad, M.D.      |
| Treasurer       | David Fassler, M.D.        |
| Secretary       | Maria A. Oquendo, M.D.     |

## ASSEMBLY

|               |                        |
|---------------|------------------------|
| Speaker       | Melinda L. Young, M.D. |
| Speaker-Elect | Jenny L. Boyer, M.D.   |
| Recorder      | Glenn A. Martin, M.D.  |

## MEDICAL DIRECTOR'S OFFICE

Medical Director and CEO James H. Scully, Jr., M.D.

## BOARD OF TRUSTEES

|                              |                         |                             |
|------------------------------|-------------------------|-----------------------------|
| Jeffrey Akaka, M.D.          | Jeffrey Geller, M.D.    | Phillip M. Murray, M.D.     |
| Christina J. Arredondo, M.D. | Marc David Graff, M.D.  | James E. Niningger, M.D.    |
| Carol A. Bernstein, M.D.     | James A. Greene, M.D.   | John M. Oldham, M.D.        |
| Lara J. Cox, M.D., M.S.      | Dilip V. Jeste, M.D.    | Uyen-Khanh Quang-Dang, M.D. |
| Brian Crowley, M.D.          | Judith F. Kashtan, M.D. | Gail E. Robinson, M.D.      |
| Anita S. Everett, M.D.       | Molly K. McVoy, M.D.    | Erik R. Vanderlip, M.D.     |

## PUBLISHER

Rebecca D. Rinehart

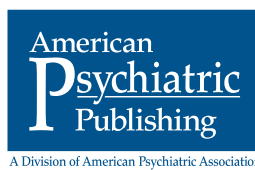

The American Journal of Psychiatry is online at [ajp.psychiatryonline.org](http://ajp.psychiatryonline.org)

THE AMERICAN PSYCHIATRIC ASSOCIATION  
Chairpersons of Councils, Commissions, Committees, and Task Forces

Standing Committees

**Bylaws**

Rebecca W. Brendel, M.D., J.D.

**Elections**

Barry K. Herman, M.D.

**Ethics**

Richard D. Milone, M.D.

**Finance and Budget**

Alan F. Schatzberg, M.D.

*Audit*

David Fassler, M.D.

*Investment Oversight*

Larry R. Faulkner, M.D.

**Joint Reference**

Paul Summergrad, M.D.

**Membership**

Jonathan M. Amiel, M.D.

**Nominating**

Dilip V. Jeste, M.D.

**Tellers**

Hind Benjelloun, M.D.

**Council on Addiction Psychiatry**

Frances R. Levin, M.D.

**Council on Advocacy and Government Relations**

Robert Paul Cabaj, M.D.

*Advocacy and Litigation Funding*

Renee L. Binder, M.D.

**Council on Children, Adolescents, and Their Families**

Louis J. Kraus, M.D.

*Agnes Purcell McGavin Award*

*Blanche F. Ittleson Research Award*

Matthew W. State, M.D.

**Council on Communications**

Jeffrey A. Borenstein, M.D.

**Council on Geriatric Psychiatry**

Robert P. Roca, M.D.

**Council on Healthcare Systems and Financing**

Howard H. Goldman, M.D.

*Reimbursement for Psychiatric Care*

Bruce J. Schwartz, M.D.

*RBRVS, Codes and Reimbursement*

Ronald M. Burd, M.D.

**Council on Medical Education and Lifelong Learning**

Richard F. Summers, M.D.

*APA Public Psychiatry Fellowship Selection Committee*

Christina V. Mangurian, M.D.

*APA/SAMHSA Minority Fellowship Selection and Advisory*

Altha J. Stewart, M.D.

*Scientific Program*

Philip R. Muskin, M.D.

*Scientific Program Committee of the Institute on Psychiatric Services*

Altha J. Stewart, M.D.

*Task Force to Update the Ethics Annotations*

Laura W. Roberts, M.D.

*Vestermark Award Committee*

Joel Yager, M.D.

**Council on Minority Health and Health Disparities**

Sandra C. Walker, M.D.

**Council on Psychiatry And Law**

Steven K. Hoge, M.D.

*Isaac Ray/Human Rights Award*

Steven K. Hoge, M.D.

*Judicial Action*

Paul S. Appelbaum, M.D.

*Manfred S. Guttmacher Award*

David A. Lowenthal, M.D.

**Council on Psychosomatic Medicine  
(Consultation Liaison Psychiatry)**

Joel E. Dimsdale, M.D.

**Council on Quality Care**

Joel Yager, M.D.

*Electronic Health Records*

Steven Roy Daviss, M.D.

*Steering Committee on Practice Guidelines*

Michael J. Vergare, M.D.

**Council on Research**

Dwight L. Evans, M.D.

*Psychiatric Dimensions of Disasters*

Charles R. Marmar, M.D.

*Research Awards*

Timothy B. Walsh, M.D.

*Task Force to Revise the Practice of Electroconvulsive Therapy*

Sarah H. Lisanby, M.D.

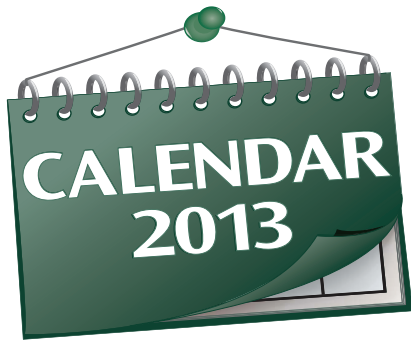

For free listing of your organization's official annual or regional meeting, please send us the following information: sponsor, location, inclusive dates, type and number of continuing education credits (if available), and the name, address, and telephone number of the person or group to contact for more information. In order for an event to appear in our listing, all notices and changes must be received at least 6 months in advance of the meeting and should be addressed to:

**Calendar, American Journal of Psychiatry, 1000 Wilson Boulevard, Suite 1825, Arlington, VA 22209-3901, [swestrade@psych.org](mailto:swestrade@psych.org) (e-mail).**

*Because of space limitations, only listings of meetings of the greatest interest to Journal readers may be included.*

---

## JULY

**July 8–13**, 28th International Congress of Applied Psychology, Palais des Congrès de Paris, France. Contact: [exh@icap2014.com](mailto:exh@icap2014.com) (email); [www.icap2014.com](http://www.icap2014.com) (web site).

---

## SEPTEMBER

**September 19–22**, North Carolina Psychiatric Association conference "Side Effects: Adherence, Tolerability and Insight in Psychiatric Treatment," Asheville, N.C. Contact: 919-859-3370 (tel); [info@ncpsychiatry.org](mailto:info@ncpsychiatry.org) (email); [www.ncpsychiatry.org/annual-meeting-scientific-session](http://www.ncpsychiatry.org/annual-meeting-scientific-session) (web site).

**September 25–27**, 9th Congress of the International Neuropsychiatric Association, Chicago, Ill. [www.inawebsite.org](http://www.inawebsite.org) (web site).

---

## OCTOBER

**October 10–13**, 65th Institute on Psychiatric Services, Philadelphia, Pa. Contact: APA Annual Meetings Dept., 1000 Wilson Blvd, Suite 1825, Arlington, VA 22209; <http://www.psychiatry.org/learn/institute-on-psychiatric-services> (web site).

**October 16–19**, annual meeting of the Association for Academic Psychiatry, Charleston, S.C. [www.academicpsychiatry.org](http://www.academicpsychiatry.org) (web site).

**October 17–21**, XXI World Congress of Psychiatric Genetics, Boston, Mass. Contact congress organizer: Parthenon Management Group, 5034A Thoroughbred Lane, Brentwood, TN 37027; (615) 324-2365 (tel); [info@parthenonmanagementgroup.com](mailto:info@parthenonmanagementgroup.com) (email); [www.wcpg2013.org](http://www.wcpg2013.org) (web site).

---

## FEBRUARY 2014

**February 16–20**, 25th Annual Meeting of the American Neuropsychiatric Association, Seattle, Wash. [www.anpaonline.org](http://www.anpaonline.org) (web site).

---

## MARCH 2014

**March 12–15**, 43rd Annual Meeting of the American Association of Directors of Psychiatric Residency Training, Tucson, Ariz. [www.aadprt.org](http://www.aadprt.org) (web site).

---

## MAY 2014

**May 3–7**, 167th Annual Meeting, American Psychiatric Association, New York, NY. Contact: APA Annual Meetings Dept., 1000 Wilson Blvd, Suite 1825, Arlington, VA 22209; (703) 907-7815 (tel); <http://www.psych.org/learn/annual-meeting> (web site).

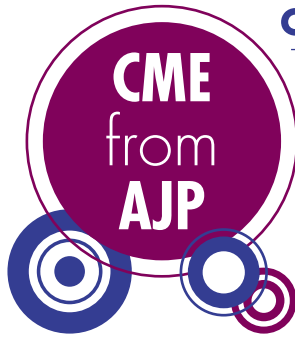

## Continuing Medical Education

Three articles in this issue form the basis of a short course with questions that can be answered for up to 1 *AMA PRA Category 1 Credit*<sup>™</sup> each by visiting <http://psychiatryonline.org/cme.aspx> and clicking on the “American Journal of Psychiatry” tab.

CME credit is issued only online, and a paid subscription to the AJP CME course program is required.

This month’s courses appear on pages 811–814.

FREE AUDIO!

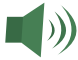

### Have You Heard?

You can listen to highlights of *The American Journal of Psychiatry* by downloading a monthly free .mp3 audio file from our web site (<http://ajp.psychiatryonline.org/audio.aspx#>) or by subscribing to the AJP Audio podcast at iTunes or other feed reader. Presented by Deputy Editor Dr. Susan Schultz or by Executive Editor Michael Roy, each month’s audio lasts approximately 30 minutes and covers several research articles, the Treatment in Psychiatry feature, and one or two editorials.

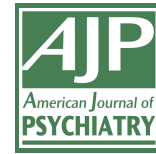

Coming in the August 2013 issue\*

## THE AMERICAN JOURNAL OF PSYCHIATRY

### Efficacy of Functional Remediation in Bipolar Disorder: A Multicenter Randomized Controlled Study

C. Torrent, C.d.M. Bonnin, A. Martínez-Arán, J. Valle, B.L. Amann, A. González-Pinto, J.M. Crespo, Á. Ibáñez, M.P. García-Portilla, R. Tabarés-Seisdedos, C. Arango, F. Colom, B. Solé, I. Pacchiarotti, A.R. Rosa, J.L. Ayuso-Mateos, C. Anaya, P. Fernández, R. Landín-Romero, S. Alonso-Lana, J. Ortiz-Gil, B. Segura, S. Barbeito, P. Vega, M. Fernández, A. Ugarte, M. Subirà, E. Cerrillo, N. Custal, J.M. Menchón, J. Saiz-Ruiz, J.M. Rodao, S. Isella, A. Alegría, S. Al-Halabi, J. Bobes, G. Galván, P.A. Saiz, V. Balanzá-Martínez, G. Selva, I. Fuentes-Durá, P. Correa, M. Mayoral, G. Chiclana, J. Merchan-Naranjo, M. Rapado-Castro, M. Salamero, and E. Vieta

### White Matter Microstructure and Atypical Visual Orienting in 7-Month-Olds at Risk for Autism

J.T. Ellison, S.J. Paterson, J.J. Wolff, J.S. Reznick, N.J. Sasson, H. Gu, K.N. Botteron, S.R. Dager, A.M. Estes, A.C. Evans, G. Gerig, H.C. Hazlett, R.T. Schultz, M. Styner, L. Zwaigenbaum, and J. Piven for the IBIS Network

### Association of GSK-3 $\beta$ Genetic Variation With GSK-3 $\beta$ Expression, Prefrontal Cortical Thickness, Prefrontal Physiology, and Schizophrenia

G. Blasi, F. Napolitano, G. Ursini, A. Di Giorgio, G. Caforio, P. Taurisano, L. Fazio, B. Gelao, M.T. Attrotto, L. Colagiorgio, G. Todarello, F. Piva, A. Papazacharias, R. Masellis, M. Mancini, A. Porcelli, R. Romano, A. Rampino, T. Quarto, M. Giuliatti, B.K. Lipska, J.E. Kleinman, T. Papolizio, D.R. Weinberger, A. Usiello, A. Bertolino

### Adapting Smoking Cessation Treatment According to Initial Response to Precessation Nicotine Patch

J.E. Rose and F.M. Behm

\*Can't wait? Visit [ajp.psychiatryonline.org/AJPinAdvance.aspx](http://ajp.psychiatryonline.org/AJPinAdvance.aspx) to see all articles uploaded in advance of print!

# The Residents' JOURNAL

## The Residents' JOURNAL

a publication of  
The American Journal of Psychiatry

May 2013

Volume 8

Issue 5

### Inside

- 2 Talking to Our Patients About DSM  
Monifa Seawell, M.D.
- 4 Autism Spectrum Disorder in DSM-5  
Hassan M. Minhas, M.D.  
Arshya Vahabzadeh, M.D.
- 7 Transition to DSM-5 While in Psychiatric Residency or Fellowship  
Sarah M. Fayad, M.D.
- 9 Sibling Rivalry: Challenges and Opportunities  
Lisa Batson, M.D.
- 11 Predicting Premature Dropout of Treatment Among Female Substance Abusers  
Aparna Iyer, M.D.
- 14 Psychodynamic Therapy in Patients Who Are Resistant to Treatment: A Critical Piece of the Puzzle  
Eric Meyer, M.D.
- 16 Test Your Knowledge
- 17 Author Information for The Residents' Journal Submissions
- 17 Upcoming Issue Themes

### In This Issue

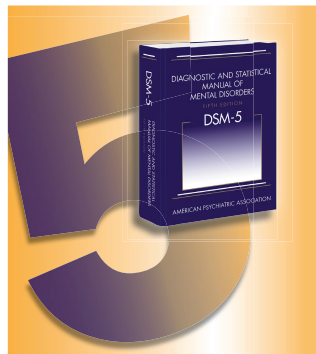

This issue of the *Residents' Journal* includes a special section on DSM-5. The section begins with an article by Editor-in-Chief Monifa Seawell, M.D., on the importance of educating ourselves and our patients about DSM and how the diagnostic changes in DSM-5 might affect the mental health community as well as treatment. Next, Hassan M. Minhas, M.D., and Associate Editor Arshya Vahabzadeh, M.D., discuss autism spectrum disorder as a new diagnostic category in DSM-5 and how the revised criteria might result in more accurate diagnosis. Last, Senior Editor Sarah M. Fayad, M.D., provides an overview of transitioning to DSM-5 while in psychiatric residency training or fellowship, emphasizing changes to the multiaxial system, dimensional assessments, and changes to diagnoses.

Editor-in-Chief  
Monifa Seawell, M.D.  
Senior Editor  
Sarah M. Fayad, M.D.  
Associate Editor  
Arshya Vahabzadeh, M.D.

Editors Emeriti  
Sarah B. Johnson, M.D.  
Molly McVay, M.D.  
Joseph M. Cerimele, M.D.  
Staff Editor  
Angela Moore

The *Residents' Journal* accepts manuscripts authored by medical students, resident physicians, and fellows. To submit your paper, please visit the manuscript submission site at [mc.manuscriptcentral.com/appi-ajp](http://mc.manuscriptcentral.com/appi-ajp) and either create an account or use your existing account. For manuscript type, select "Residents." Then follow the instructions to upload your manuscript. Residents who are interested in participating as Guest Section Editors should e-mail *The Residents' Journal* Editor-in-Chief Monifa Seawell at [mseawell@med.wayne.edu](mailto:mseawell@med.wayne.edu).

The *Residents' Journal* is sent free-of-charge to all psychiatry residents. Anyone interested in being included on the distribution list should contact Angela Moore, *The Residents' Journal* staff editor at [ajp@psych.org](mailto:ajp@psych.org) with "Subscribe to Residents' Journal" in the subject line.

To access the complete *Residents' Journal* archives, visit [ajp.psychiatryonline.org/residents\\_journal.aspx](http://ajp.psychiatryonline.org/residents_journal.aspx)



## Contents

- A21 Editorial Board  
A23 Highlights of this issue

## Editorials

- 391 **Multimorbidity and mental health: can psychiatry rise to the challenge?**  
J. Langan, S. W. Mercer and D. J. Smith

- 393 **Menstrual psychosis – in 100 words**  
Ian Brockington

- 394 **A golden age of discovery**  
D. Kingdon

- 396 **Antidepressant drugs and sexual dysfunction**  
D. S. Baldwin and T. Foong

- 398 **Role of dietary supplementation in attention-deficit hyperactivity disorder**  
P. Rajyaguru and M. Cooper

## Review article

- 400 **The full spectrum of ethical issues in dementia care: systematic qualitative review**  
D. Strech, M. Mertz, H. Knüppel, G. Neitzke and M. Schmidhuber

## Papers

- 407 **Day-to-day associations between subjective sleep and affect in regard to future depression in a female population-based sample**  
J. A. de Wild-Hartmann, M. Wichers, A. L. van Bemmelen, C. Derom, E. Thiery, N. Jacobs, J. van Os and C. J. P. Simons

- 413 **Incidence and 12-month outcome of non-transient childhood conversion disorder in the UK and Ireland**  
C. Ani, R. Reading, R. Lynn, S. Forlee and E. Garralda

- 419 **The structure of paranoia in the general population**  
P. E. Bebbington, O. McBride, C. Steel, E. Kuipers, M. Radovanović, T. Brugha, R. Jenkins, H. I. Meltzer and D. Freeman

- 427 **The Edge – poems by doctors**  
Charles Montgomery

- 428 **Computer-assisted therapy for medication-resistant auditory hallucinations: proof-of-concept study**  
J. Leff, G. Williams, M. A. Huckvale, M. Arbutnot and A. P. Leff

- 433 **Jaspers and the first edition of *Allgemeine Psychopathologie* – reflection**  
German E. Berrios

- 434 **Effects of illness duration and treatment resistance on grey matter abnormalities in major depression**  
M. Serra-Blasco, M. J. Portella, B. Gómez-Ansón, J. de Diego-Adeliño, Y. Vives-Gilabert, D. Puigdemont, E. Granel, A. Santos, E. Álvarez and V. Pérez

- 441 **Cost-effectiveness of depression case management in small practices**  
J. Gensichen, J. J. Petersen, M. Von Korff, D. Heider, S. Baron, J. König, A. Freytag, C. Krauth, F. M. Gerlach and H.-H. König

- 446 **Abandoned – poem**  
Bear Loveday Tyler

- 447 **Evaluating the impact of a quality of life assessment with feedback to clinicians in patients with schizophrenia: randomised controlled trial**  
L. Boyer, C. Lançon, K. Baumstarck, N. Parola, J. Berbis and P. Auquier

- 454 **Changes in capacity to consent over time in patients involved in psychiatric research**  
B. W. Palmer, G. N. Savla, S. C. Roesch and D. V. Jeste

- 459 **How psychiatrists should introduce themselves in the first consultation: an experimental study**  
S. Priebe, C. Palumbo, S. Ahmed, N. Strappelli, J. Jankovic Gavrilovic and S. Bremner

## Columns

- 463 Correspondence  
469 Contents of *Advances in Psychiatric Treatment*  
470 Book review  
471 Contents of the *American Journal of Psychiatry*  
472 From the Editor's desk

## Cover picture

*Old Woman* (2010) by Ingrid Deventer (b. 1952)

Ingrid Deventer writes: 'It was my aim to depict an old lady with an expressive face. Her very dark eyes and red lips dominate the work. Her black eyes and vivid red mouth speak of her wild and intensive life. The painting in general pays tribute to the older generation, but especially to my 90-year-old mother, who is still alive.'

'I have been a psychiatric patient since 1981 when I was diagnosed with schizophrenia. I was not able to work again and instead, in 2001, I eventually started to paint. Once a week, over a period of 10 years, I have attended art therapy workshops at the Ameos Hospital Osnabrück, Germany. The art-studio is run by the art therapist Katja Watermann, whose help I greatly appreciate. In 2010, I received a prize for my *Old Woman*.'

Ingrid Deventer: [www.kunst-deventer.de](http://www.kunst-deventer.de).

Katja Waterman: [kwat.td@osnabrueck.ameos.de](mailto:kwat.td@osnabrueck.ameos.de)

We are always looking for interesting and visually appealing images for the cover of the *Journal* and would welcome suggestions or pictures, which should be sent to Dr Allan Beveridge, British Journal of Psychiatry, 17 Belgrave Square, London SW1X 8PG, UK or [bjp@rcpsych.ac.uk](mailto:bjp@rcpsych.ac.uk).

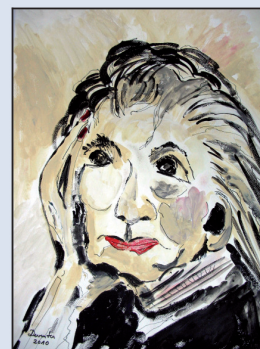

Source: http://ajp.psychiatryonline.org/doi/suppl/10.1176/ajp.2013.170.issue-7/suppl_file/front.pdf
