# THE AMERICAN JOURNAL OF PSYCHIATRY

## En este número

A14

### Perspectivas

#### Editoriales

- 695 **La dinámica de la psicopatología subumbral: Implicaciones para el diagnóstico y el tratamiento**  
Jim van Os
- 699 **Aprovechando los receptores *N*-metil-D-aspartato para el desarrollo de nuevos tratamientos en psiquiatría: Lecciones positivas de estudios negativos**  
Daniel C. Javitt
- 703 **El nudo gordiano de la investigación clínica en los trastornos de ansiedad: Algunas respuestas, más preguntas**  
Barbara Milrod **Audio**
- 707 **¿Cuáles son los cursos de tratamiento óptimos para la ansiedad geriátrica y cómo lo descubrimos?**  
David H. Barlow y Jonathan S. Comer **Audio**

#### Comentario

- 712 **Psicoterapia: Una paradoja**  
Myrna M. Weissman

#### Tratamiento en Psiquiatría

- 716 **Tratamiento conductual del insomnio en el trastorno bipolar**  
Katherine A. Kaplan y Allison G. Harvey  
**Audio Guías clínicas**

#### Imágenes en Psiquiatría

- 721 **Ifis y Anaxárate en *Las Metamorfosis* de Ovidio: Poema del amante rechazado**  
Amir Garakani y Nathaniel Mendelsohn

#### Resúmenes y Reseñas

- 723 **Un modelo de la respuesta al placebo en los ensayos clínicos con antidepresivos**  
Bret R. Rutherford y Steven P. Roose **Audio**

## Nuevas Investigaciones

### Artículos

- 734 **Psicosis y trauma Infantil en un estudio de cohortes prospectivo: Causa, efecto y direccionalidad**  
Ian Kelleher, Helen Keeley, Paul Corcoran, Hugh Ramsay, Camilla Wasserman, Vladimir Carli, Marco Sarchiapone, Christina Hoven, Danuta Wasserman y Mary Cannon **Audio**
- 742 **Experiencias psicóticas y trastornos psicóticos a los 18 años en relación con experiencias psicóticas a los 12 años en un estudio longitudinal de cohortes basado en la población**  
Stanley Zammit, Daphne Kounali, Mary Cannon, Anthony S. David, David Gunnell, Jon Heron, Peter B. Jones, Shôn Lewis, Sarah Sullivan, Dieter Wolke, y Glyn Lewis **Editorial EMC**
- 751 **La *D*-cicloserina como estrategia de aumento en la terapia cognitivo-conductual para el trastorno de ansiedad social**  
Stefan G. Hofmann, Jasper A.J. Smits, David Rosenfield, Naomi Simon, Michael W. Otto, Alicia E. Meuret, Luana Marques, Angela Fang, Candyce Tart, y Mark H. Pollack  
**Editorial EMC**
- 759 **La terapia psicodinámica y la terapia cognitivo-conductual en el trastorno de ansiedad social: Un ensayo multicéntrico controlado y aleatorizado**  
Falk Leichsenring, Simone Salzer, Manfred E. Beutel, Stephan Herpertz, Wolfgang Hiller, Juergen Hoyer, Johannes Huesing, Peter Joraschky, Bjoern Nolting, Karin Poehlmann, Viktoria Ritter, Ulrich Stangier, Bernhard Strauss, Nina Stuhldreher, Susan Tefikow, Tobias Teismann, Ulrike Willutzki, Joerg Wiltink, y Eric Leibing **Audio Guías clínicas Editorial**
- 768 **Revisión de la hipótesis de ansiedad de separación en el trastorno de pánico: Un meta-análisis**  
Joe Kossowsky, Monique C. Pfaltz, Silvia Schneider, Jan Taeymans, Cosima Locher, y Jens Gaab  
**Editorial**
- 782 **Aumento de medicamentos antidepresivos con terapia cognitivo-conductual para el trastorno de ansiedad generalizada en adultos mayores**  
Julie Loebach Wetherell, Andrew J. Petkus, Kamila S. White, Hoang Nguyen, Sander Kornblith, Carmen Andreescu, Sidney Zisook, y Eric J. Lenze  
**Audio Guías clínicas Editorial**

**790 Agorafobia de aparición tardía: Incidencia en la población general y evidencia de un subtipo clínico**

Karen Ritchie, Joanna Norton, Anthony Mann, Isabelle Carrière, y Marie-Laure Ancelin

**Audio** **Guías clínicas** **EMC**

## Comunicados y Actualizaciones

### Cartas al Editor

- 799** Puntos claves en relación a la eficacia del tratamiento conductual para el TDAH  
¿Evidencia de la eficacia de la neuroretroalimentación en el TDAH?  
Hipertemia de todo el cuerpo para el tratamiento de la depresión mayor: Asociaciones con el enfriamiento termorregulador  
Presunta disminución de dronabinol en un paciente mayor enfermo que nunca ha probado el cannabis  
SLC6A15 rs1545843 y depresión: Implicaciones de los datos de imágenes cerebrales

### Reseñas Bibliográficas

- 806** Sports Psychiatry: Strategies for Life Balance and Peak Performance [Psiquiatría deportiva: Estrategias para una vida equilibrada y máximo rendimiento]  
The Mental Health Professional in Court: A Survival Guide [El profesional de la salud mental en la corte: Una guía de supervivencia]  
Bad Boys, Bad Men: Confronting Antisocial Personality Disorder (Sociopathy) [Niños malos, hombres malos. Cómo hacer frente al trastorno de la personalidad antisocial (sociopatía)]  
Angst: Origins of Anxiety and Depression [Angst: Orígenes de la ansiedad y la depresión]

**810** Correction

### Otros Temas de Interés

**811** Educación Médica Continuada

**A6** Directivos de la American Psychiatric Association

**A8** Calendario

**A13** Contenidos del *British Journal of Psychiatry*

### Cubierta

Concepto de la cubierta de Wendy Taylor.

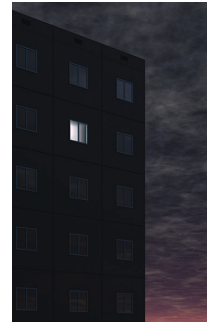

#### Audio

artículo en AJP Audio: archivo .mp3 descargable de [ajp.psychiatryonline.org](http://ajp.psychiatryonline.org)

#### Guías clínicas

este artículo ofrece guías clínicas (ver página "En este Número" o al final del artículo)

#### EMC

existe un curso en línea que cubre los contenidos de este artículo para los suscriptores del programa de cursos de EMC del AJP

#### Editorial

este artículo se discute en uno de los editoriales de este número

This issue's Spanish Table of Contents is presented in collaboration with the Office of Global Health, UMDNJ-Robert Wood Johnson Medical School

Translation courtesy of  
Sergi Casals, M.S.

*Garuna Editors (www.garunaeditors.com), Barcelona, Spain*

Carlos Lopez Jaramillo,  
*Universidad de Antioquia, Medellin, Colombia*

and

Javier I. Escobar, M.Sc.  
*UMDNJ-Robert Wood Johnson Medical School*
