# THE AMERICAN JOURNAL OF PSYCHIATRY

---

- 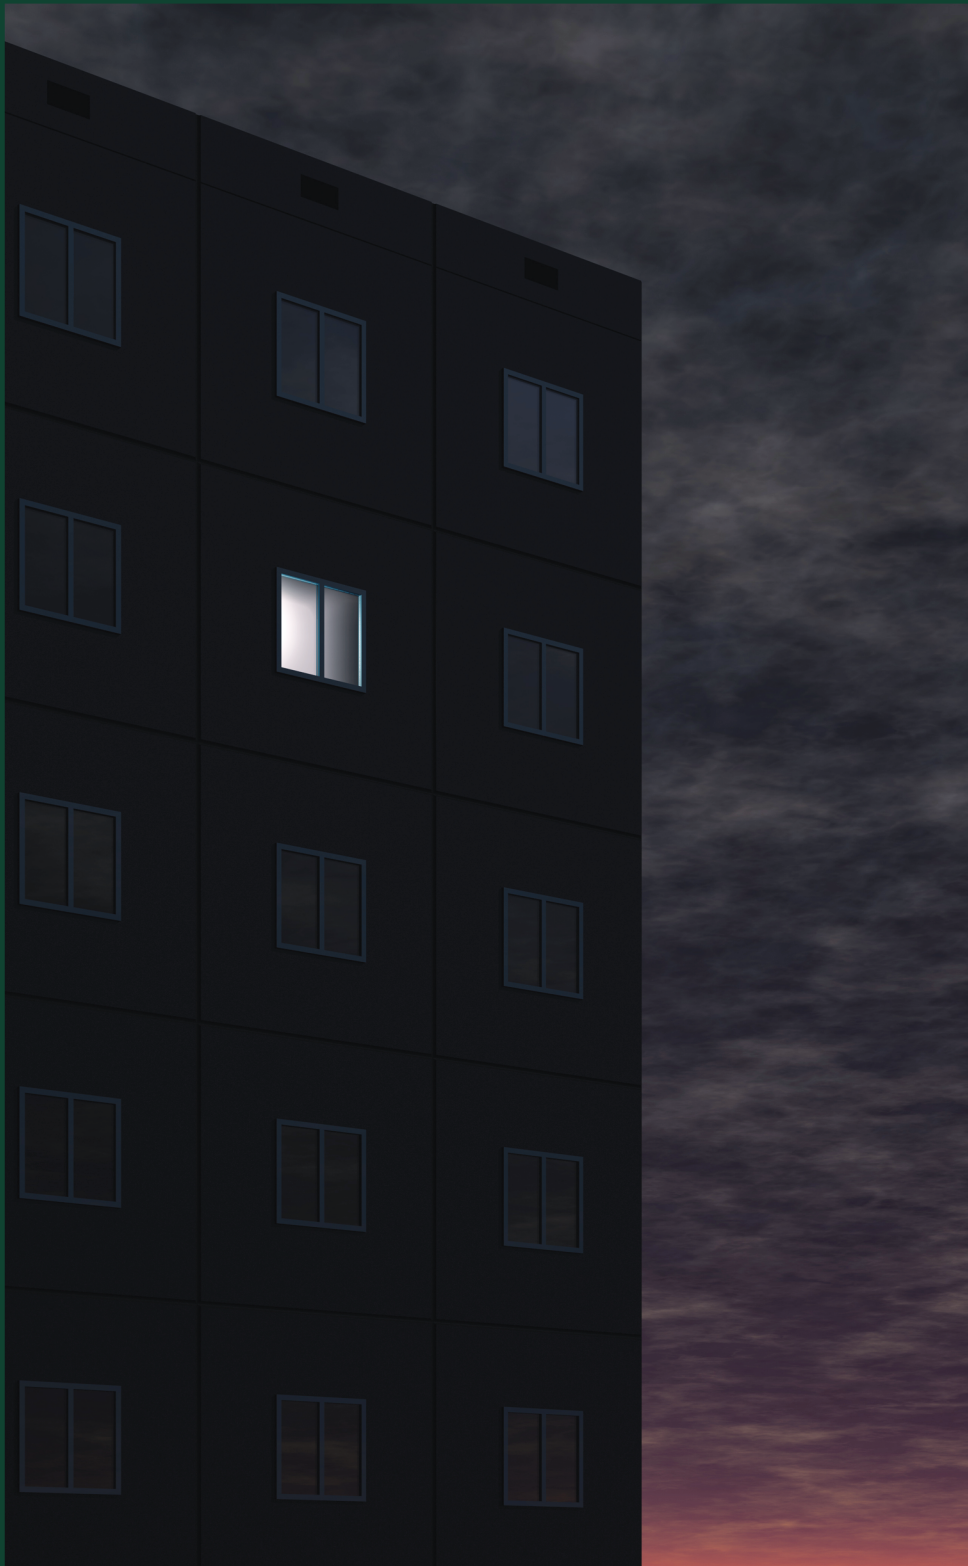
- ◀ **Behavioral Treatment of Insomnia  
in Bipolar Disorder**  
Katherine A. Kaplan, M.A., and  
Allison G. Harvey, Ph.D. 716
- D-Cycloserine as an Augmentation  
Strategy With Cognitive-  
Behavioral Therapy for Social  
Anxiety Disorder**  
Stefan G. Hofmann, Ph.D., et al. 751
- Psychodynamic Therapy and  
Cognitive-Behavioral Therapy in  
Social Anxiety Disorder**  
Falk Leichsenring, D.Sc., et al. 759
- Antidepressant Medication  
Augmented With Cognitive-  
Behavioral Therapy for  
Generalized Anxiety Disorder  
in Older Adults**  
Julie Loebach Wetherell, Ph.D., et al. 782

**July 2013**

**Volume 170 • Number 7**

---

Official Journal of the  
AMERICAN PSYCHIATRIC ASSOCIATION

---

[ajp.psychiatryonline.org](http://ajp.psychiatryonline.org)
